# Supplementary material for: Pluronic-123 Assisted Synthesis of Cobalt Vanadate Microparticles (µ-CoV MPs) for Durable Electrochemical Oxygen Evolution Reaction in Seawater and Connate Water
Source: MDPI journal article supplement (doi:10.3390/catal13030636), 2023-03-22
Supplement: s1 [file s1]

Archive with 1 entries (1 files):
- catalysts-2233806-supplementary.pdf
