# Supplementary material for: Pluronic-123 Assisted Synthesis of Cobalt Vanadate Microparticles (µ-CoV MPs) for Durable Electrochemical Oxygen Evolution Reaction in Seawater and Connate Water
Source: MDPI journal article supplement (doi:10.3390/catal13030636), 2023-03-22
Supplement: s1 [file s1 › catalysts-2233806-supplementary.pdf]

## *Supporting Information*

# ***Pluronic-123-Assisted Synthesis of Cobalt Vanadate Microparticles ( $\mu$ -CoV MPs) for Durable Electrochemical Oxygen Evolution Reaction in Seawater and Connate Water***

Ibrahim Khan <sup>†</sup>

School of Chemical Engineering and Materials Science, Chung-Ang University, 84 Heukseok-ro, Dongjak-gu, Seoul 06974, Republic of Korea; ebraheem.chemist@gmail.com or ebraheemchem@cau.ac.kr

<sup>†</sup> Ibrahim Khan (BrainPool Researcher).

### **Post OER XRD spectral comparison**

The phase structure and crystallinity characterization of the post-OER metal vanadates electrodes calcined at 400 °C ( $\mu$ -CoV-400) were scanned from 10° to 80° (2 $\theta$ ) at a scan rate of 0.05 degrees/min) and compare with as-fabricated fresh  $\mu$ -CoV-400 electrodes (**Figure S1**). The high-intensity characteristic XRD diffraction patterns (022), (220), (331), (400), (004), (511), and (440) correspondingly centred at the 2 $\theta$  = 27.5°, 29.3 °, 34.6 °, 42.8 °, 53.4 °, 58.7 ° and 63.1 ° were reduced in the OER measured electrodes [43,57–59]. The reduction in peak intensity suggests intense physicochemical changes at the electrode surface during the OER in SW after the electrochemical stability test.

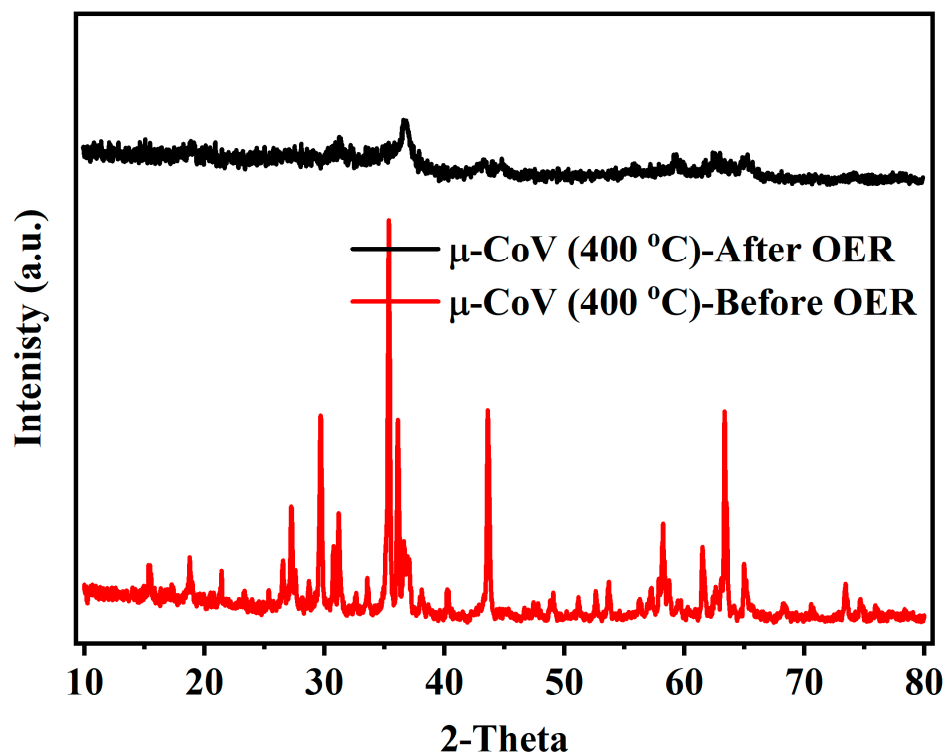

**Figure S1:** XRD patterns of  $\mu$ -CoV MPs-400 °C before OER and after OER in SW.

### Electrokinetic comparison in terms of Tafel plots

As shown in **Figure S2**, The high Tafel slope value of  $199 \text{ mV dec}^{-1}$  was obtained from  $\mu$ -CoV MPs@400 °C in CW electrolyte after 1 h OER. In response, the rate of reaction is slightly reduced from  $199 \text{ mV dec}^{-1}$  to  $206 \text{ mV dec}^{-1}$ , in SW, which is possibly due to the strong alkalinity and concentration of CW water that offered slightly more resistance in the OER process.

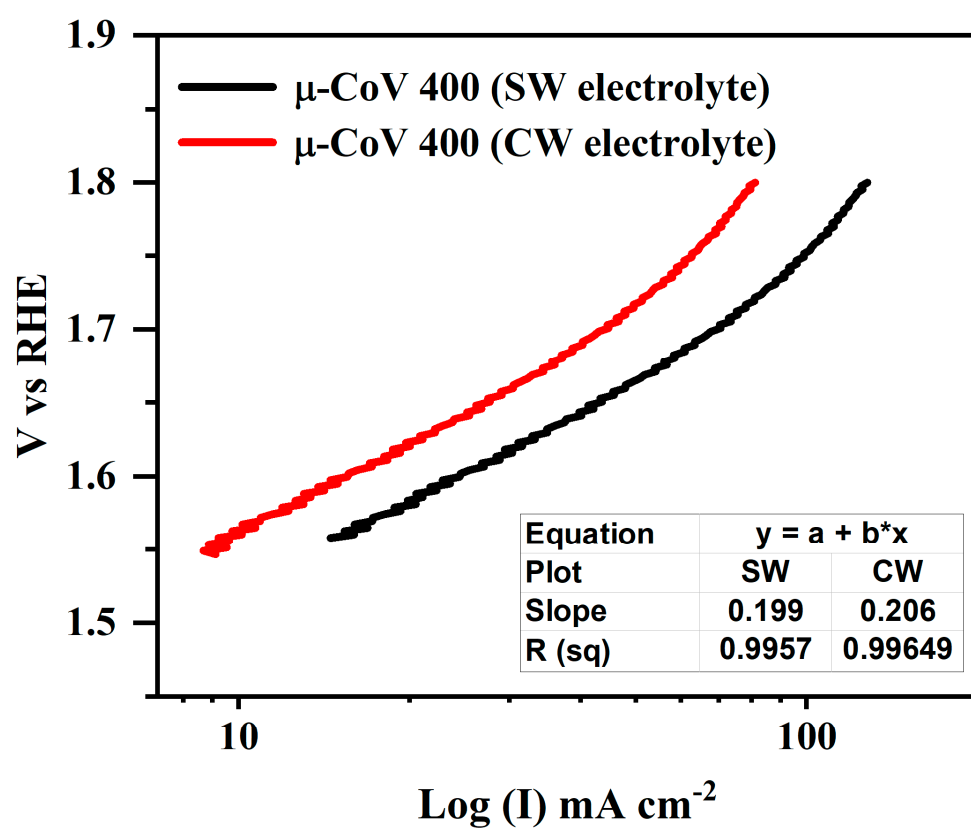

**Figure S2:** Tafel plots under different electrolytic conditions.
